# Supplementary material for: DHX37 and NR5A1 Variants Identified in Patients with 46,XY Partial Gonadal Dysgenesis
Source: MDPI journal article supplement (doi:10.3390/life13051093), 2023-04-27
Supplement: s1 [file s1]

**Table S3:** Additional findings obtained by WES after specific filtering.

| Patient | Gene                     | Nucleotide / Amino acid alteration | Type       | Allele frequency / allele count | Zygosity | SNP ID           | CADD score | ACMG Guidelines | OMIM                                       |
|---------|--------------------------|------------------------------------|------------|---------------------------------|----------|------------------|------------|-----------------|--------------------------------------------|
| 1       | WNT4<br>(NM_030761.5)    | c.96G>A / p.Ser32=                 | synonymous | 0.001552 / 55                   | HET      | rs144407094      | NA         | Likely benign   | Mullerian aplasia and hyperandrogenism, AD |
| 2       | MID1<br>(NM_000381.4)    | c.1014G>A / p.Gly338=              | synonymous | 0.01123 / 214                   | HEMI     | rs147909430      | 7.18       | Benign          | Opitz GBBB syndrome, XLR                   |
| 3       | FLNA<br>(NM_001110556.2) | c.4250A>T / p.Tyr1417Phe           | missense   | NA                              | HEMI     | rs155717745<br>6 | 13.44      | Likely benign   | Cardiac valvular dysplasia, X-linked, XL   |

NA: not available; SNP ID: single nucleotide polymorphism identification; HET: heterozygous; HEMI: hemizygous; AD: autosomal dominant; XLR: X-linked recessive; XL: X-linked.

For this project, data from GnomAD (Genome Aggregation Database) database v2.1.1 was used based on the population with the highest allele frequency.
