# Supplementary material for: DHX37 and NR5A1 Variants Identified in Patients with 46,XY Partial Gonadal Dysgenesis
Source: MDPI journal article supplement (doi:10.3390/life13051093), 2023-04-27
Supplement: s1 [file s1]

|        |            |                  |                                                     |                      |      |
|--------|------------|------------------|-----------------------------------------------------|----------------------|------|
| Val999 |            |                  |                                                     |                      |      |
| sp     | P53131     | PRP43_YEAST      | KKRSGAKGYITVKDNQDVLHPSTVLGH-DAEWVIYNEFVLTSKNYIRTVTS | V                    | 715  |
| tr     | B8JLP0     | B8JLP0_DANRE     | ----WRNAYKTPLDDPVFIHPSSALHKTLP                      | EFVVYQEIMETTKMYMRGVC | 993  |
| tr     | H0VXV8     | H0VXV8_CAVPO     | ----WRNAYKTPLDDPVFIHPSSVLFRELPEFVVYQEIVETTKLYMKGVS  | A                    | 1005 |
| tr     | Q5DTX1     | Q5DTX1_MOUSE     | ----WKNAYKTPLDDPVFIHPSSVLFKELPEFVVYQEIVETTKMYMKGVS  | T                    | 781  |
| sp     | Q8IY37     | DHX37_HUMAN      | ----WRNAYKTPLDDPVFIHPSSVLFKELPEFVVYQEIVETTKMYMKGVS  | S                    | 1001 |
| tr     | A0A2I3RKE8 | A0A2I3RKE8_PANTR | ----WRNAYKTPLDDPVFIHPSSVLFKELPEFVVYQEIVETTKMYMKGVS  | S                    | 999  |

**Figure S1.** Alignment of the sequence region containing the Val999 residue using Clustal Omega software (<https://www.ebi.ac.uk/Tools/msa/clustalo/>) with five other species: yeast, mouse, chimpanzee, zebrafish, and pig. The amino acid Val999 is conserved across all the species.
