# Supplementary material for: DHX37 and NR5A1 Variants Identified in Patients with 46,XY Partial Gonadal Dysgenesis
Source: MDPI journal article supplement (doi:10.3390/life13051093), 2023-04-27
Supplement: s1 [file s1]

**Table S2.** Recurrent *DHX37* variants identified among 25 46,XY DSD patients from our cohort.

| <i>DHX37</i> variant       | SNP ID       | GnomAD frequency | <i>In silico</i> prediction tools |            |                 |                   |           |
|----------------------------|--------------|------------------|-----------------------------------|------------|-----------------|-------------------|-----------|
|                            |              |                  | ACMG Guidelines                   | CADD score | Mutation taster | PolyPhen-2        | SIFT      |
| c.63G>A/<br>p.Ser61=       | rs1434551572 | 0.000014         | Probably benign                   | 5.862      | Polymorphism    | -                 | -         |
| c.288G>A/<br>p.Met96Ile    | rs11558556   | 0.357423         | Probably benign                   | 20.6       | Polymorphism    | Benign            | Tolerable |
| c.1373G>A/<br>p.Arg458Gln  | rs11057939   | 0.110052         | Benign                            | 23.4       | Polymorphism    | Possibly damaging | Tolerable |
| c.2025G>A/<br>p.Thr675=    | rs4076777    | 0.360214         | Benign                            | 7.572      | Polymorphism    | -                 | -         |
| c.2331A>G/<br>p.Thr777=    | rs10773127   | -                | Benign                            | 1.720      | Polymorphism    | -                 | -         |
| c.2367A>C/<br>p.Ala789=    | rs115567271  | 0.027030         | Benign                            | 0.086      | Polymorphism    | -                 | -         |
| c.2499G>T/<br>p.Arg833=    | rs11829165   | 0.155955         | Benign                            | 11.0       | Polymorphism    | -                 | -         |
| c.2598G>A/<br>p.Glu866=    | rs4258464    | -                | Benign                            | 5.911      | Polymorphism    | -                 | -         |
| c.2605A>G/<br>p.Ser869Gly  | rs4516060    | -                | Probably benign                   | 16.6       | Polymorphism    | Benign            | Tolerable |
| c.2793A>G/<br>p.Ala931=    | rs4429156    | -                | Probably benign                   | 8.359      | Polymorphism    | -                 | -         |
| c.3195C>T/<br>p.Ala1065=   | rs4078216    | 0.201904         | Benign                            | 9.254      | Polymorphism    | -                 | -         |
| c.3242G>A/<br>p.Arg1081Gln | rs4447263    | -                | Probably benign                   | 0.907      | Polymorphism    | Benign            | Tolerable |
