# Supplementary material for: DHX37 and NR5A1 Variants Identified in Patients with 46,XY Partial Gonadal Dysgenesis
Source: MDPI journal article supplement (doi:10.3390/life13051093), 2023-04-27
Supplement: s1 [file s1]

**Supplemental Table S1.** *DHX37* variants identified in individuals with 46,XY DSD.

| <i>DHX37</i> variant     | Genotype | Diagnosis                                        | Inheritance    | Reference                    |
|--------------------------|----------|--------------------------------------------------|----------------|------------------------------|
| c.911C>T / p.Tre304Met   | Het      | GD                                               | Maternal       | McElreavey et al., 2019 [11] |
|                          | Het      | GD                                               | <i>De novo</i> |                              |
|                          | Het      | GD                                               | NA             | Da Silva et al., 2019 [25]   |
| c.923G>A / p.Arg308Gln   | Het      | Two brothers with TRS                            | Paternal       | Da Silva et al., 2019 [25]   |
|                          | Het      | TRS                                              | <i>De novo</i> |                              |
|                          | Het      | TRS                                              | NA             |                              |
|                          | Het      | Proband with TRS<br>Maternal uncle with TRS      | Maternal       |                              |
|                          | Het      | PGD                                              | <i>De novo</i> |                              |
|                          | Het      | GD                                               | <i>De novo</i> |                              |
|                          | Het      | GD                                               | NA             | McElreavey et al., 2019 [11] |
|                          | Het      | GD                                               | NA             |                              |
|                          | Het      | GD                                               | NA             |                              |
|                          | Het      | TRS                                              | <i>De novo</i> | Buonocore et al., 2019 [18]  |
|                          | Het      | PGD                                              | <i>De novo</i> |                              |
|                          | Het      | PGD                                              | <i>De novo</i> |                              |
|                          | Het      | PGD                                              | <i>De novo</i> | Zidoune et al., 2021 [32]    |
|                          | Het      | TRS                                              | <i>De novo</i> |                              |
|                          | Het      | TRS                                              | Maternal       |                              |
|                          | Het      | TRS                                              | NA             | This study                   |
|                          | Het      | PGD                                              | NA             |                              |
| c.1000C>T / p.Arg334Trp  | Het      | TRS                                              | NA             | McElreavey et al., 2019 [11] |
|                          | Het      | TRS                                              | NA             | Zidoune et al., 2021 [32]    |
| c.1001G>T / p.Arg334Leu  | Het      | GD                                               | <i>De novo</i> | McElreavey et al., 2019 [11] |
| c.1169G>A / p.Arg390His  | Het      | Idiopathic 46,XY DSD                             | NA             | Zidoune et al., 2021 [32]    |
| c.1399C>G / p.Leu467Val  | Het      | PGD                                              | Maternal       | This study                   |
| c.1430C>T / p.Tre477Met  | Het      | PGD                                              | <i>De novo</i> | Buonocore et al., 2019 [18]  |
|                          | Hom      | TRS                                              | Both           | Zidoune et al., 2021 [32]    |
| c.1460G>A / p.Arg487His  | Het      | Idiopathic 46,XY DSD                             | NA             | Zidoune et al., 2021 [32]    |
| c.1474G>C / p.Ala494Pro  | Het      | Idiopathic 46,XY DSD                             | NA             | Gomes et al., 2022 [5]       |
| c.1784C>T / p.Ser595Phe  | Het      | Proband with PGD<br>Maternal uncle with TRS      | Maternal       | Da Silva et al., 2019 [25]   |
| c.1877C>T / p.Ser626Leu  | Het      | TRS                                              | NA             | McElreavey et al., 2019 [11] |
| c.2021C>T / p.Arg674Trp  | Het      | Two brothers with TRS                            | Maternal       | Da Silva et al., 2019 [25]   |
|                          | Het      | Two brothers with TRS<br>Maternal uncle with PGD | Maternal       |                              |
|                          | Het      | TRS                                              | NA             |                              |
|                          | Het      | PGD                                              | Maternal       |                              |
| c.2021G>A / p.Arg674Gln  | Het      | GD                                               | NA             | McElreavey et al., 2019 [11] |
|                          | Het      | GD                                               | <i>De novo</i> |                              |
|                          | Het      | GD                                               | NA             | Globa et al., 2022 [20]      |
| c.2209G>A / p.Ala737Thr  | Het      | Idiopathic 46,XY DSD                             | NA             | Gomes et al., 2022 [5]       |
| c.2995G>A / p.Val999Met  | Het      | PGD                                              | Paternal       | This study                   |
|                          | Het      | PGD                                              | NA             |                              |
| c.3089G>A / p.Gly1030Glu | Het      | TRS                                              | NA             | McElreavey et al., 2019 [11] |
|                          | Het      | TRS                                              | NA             | Globa et al., 2022 [20]      |

CGD: complete gonadal dysgenesis; GD: gonadal dysgenesis; PGD: partial gonadal dysgenesis; TRS: testicular regression syndrome; NA: not available.
