# Supplementary material for: DHX37 and NR5A1 Variants Identified in Patients with 46,XY Partial Gonadal Dysgenesis
Source: Life (Basel). 2023 Apr 27;13(5):1093. doi: 10.3390/life13051093 (PMC10222664; doi:10.3390/life13051093)
Supplement: Supplementary file 1 [file life-13-01093-s001.zip]

Archive with 4 entries (4 files):
- Figure S1.pdf
- Table S1. Variants described so far in published articles.pdf
- Table S2. Recurrent variants described in 46,XY DSD patients in our cohort.pdf
- Table S3. Additional findings obtained by WES after specific filtering.pdf
